# Supplementary material for: A fluorescent conjugated polymer-based ratiometric aptasensor for highly specific and robust detection of perfluorooctanoic acid
Source: Royal Society of Chemistry journal article supplement (doi:10.1039/d5cc07080e), 2026-01-01
Supplement: d5cc07080e1.pdf [file d5cc07080e1.pdf]

## Electronic Supplementary Information

### **A Fluorescent Conjugated Polymer-based Ratiometric Aptasensor for Highly Specific and Robust Detection of Perfluorooctanoic Acid**

Hao Liu <sup>a</sup>, Qin-feng Xu <sup>a,\*</sup>, Zhao-zhao Zhang <sup>a</sup>, Yan-ni Li <sup>a</sup>, and Chun-yang Zhang <sup>b,\*</sup>

<sup>a</sup> School of Food Science and Engineering, Shaanxi University of Science and Technology, Xi'an,  
Shaanxi 710021, China.

<sup>b</sup> School of Chemistry and Chemical Engineering, Southeast University, Nanjing, 211189, China.

\* Correspondence author. E-mail: xuqinfeng@sust.edu.cn (Q-f. Xu); zhangcy@seu.edu.cn (C-y.  
Zhang).

## **Experimental section**

### **Chemicals and materials**

Poly[(9,9-bis(6'-N,N,N-trimethylammonium)hexyl)-fluorenylene phenylene dibromide] (PFP) was synthesized according to the published procedures.<sup>1</sup> Perfluorohexanoic acid (PFHxA), perfluorooctanoic acid (PFOA), perfluorobutyric acid (PFBA), perfluorobutanesulfonic acid (PFBS), and octanoic acid (OA) were purchased from Sigma-Aldrich. The high-performance liquid chromatography (HPLC)-purified oligonucleotide was synthesized by Sangong Biotechnology (Shanghai, China). The sequences of the nucleic acids used in the study are as follows: Apt-FAM, 5'-FAM-GGCGTGGGGTGGTAGGCTGTAAAGGGGGTC-3'. Ultrapure water was obtained from a Milli-Q system (Millipore, Milford, MA, USA).

### **Ratiometric fluorescence aptasensor for sensitive detection of perfluorooctanoic acid**

Apt-FAM was diluted in 1× Tris-EDTA buffer to 10 μM, and then diluted with HEPES buffer (20 mM HEPES, 1 mM NaCl, pH 7.4) to a final concentration of 1 μM. Subsequently, 0.5 μL of Apt-FAM solution was mixed with the reaction mixture (total 19 μL containing different concentrations of PFOA and 18.5 μL of HEPES buffer), and incubated for 10 min at room temperature. After incubation, 0.5 μL of PFP (100 μM) was added to initiate the fluorescent conjugated polymer-based ratiometric aptasensing reaction.

### **Fluorescence measurements**

Fluorescence spectra were recorded on an FS5 fluorescence spectrophotometer (Edinburgh Instruments Ltd., UK) with an excitation wavelength of 380 nm and an emission range of 400–650 nm. The limit of detection (LOD) is determined based on the  $3\sigma/k$  method, where  $\sigma$  is the standard

deviation of y-intercepts of regression line and  $k$  is the slope of the calibration curve.

### **Analysis of tap water samples**

To evaluate the practical applicability of the ratiometric aptasensor, tap water was collected from Shaanxi University of Science and Technology (Xi'an, Shaanxi, China) and used for testing. The samples were spiked with the known concentrations of PFOA to prepare the standard solutions. The PFOA-spiked samples were mixed with Apt-FAM in HEPES buffer (20 mM HEPES, 1 mM NaCl, pH 7.4), and incubated for 10 minutes at room temperature. After the incubation, PFP (2.5  $\mu$ M) was added, and the resulting fluorescence color changes were recorded by using a smartphone for visual analysis.

## SUPPLEMENTARY RESULTS

### Optimization of experimental conditions.

To achieve optimal assay performance, we systematically optimized several experimental parameters including the concentrations of PFP and Apt–FAM and the incubation time required for PFOA binding to Apt–FAM. The effect of each parameter is evaluated by monitoring  $(I_{525}/I_{420})/(I_{525}/I_{420})_0$ , where  $(I_{525}/I_{420})$  and  $(I_{525}/I_{420})_0$  denote the FRET ratios measured in the presence and absence of PFOA, respectively.

The concentration of PFP is a critical factor in the detection system and should be optimized. As shown in Fig. S1 the  $(I_{525}/I_{420})/(I_{525}/I_{420})_0$  value enhances with the increasing PFP concentration from 0 to 2.5  $\mu\text{M}$ , and then decreases at higher PFP concentrations. Thus, 2.5  $\mu\text{M}$  is selected as the optimal PFP concentration for subsequent experiments.

The effect of Apt–FAM concentration on the assay performance is examined well. As shown in Fig. S2 the  $(I_{525}/I_{420})/(I_{525}/I_{420})_0$  value improves with the increasing concentration of Apt–FAM from 0 to 25 nM, followed by a decrease beyond 25 nM. Therefore, 25 nM Apt–FAM is chosen as the optimal concentration for subsequent experiments.

The influence of incubation time on the binding interaction between PFOA and Apt–FAM is investigated. As shown in Fig. S3 the  $(I_{525}/I_{420})/(I_{525}/I_{420})_0$  value enhances with the incubation time from 3 to 10 min, and reaches a plateau thereafter. Thus, 10 min is selected as the optimal incubation time for the assay.

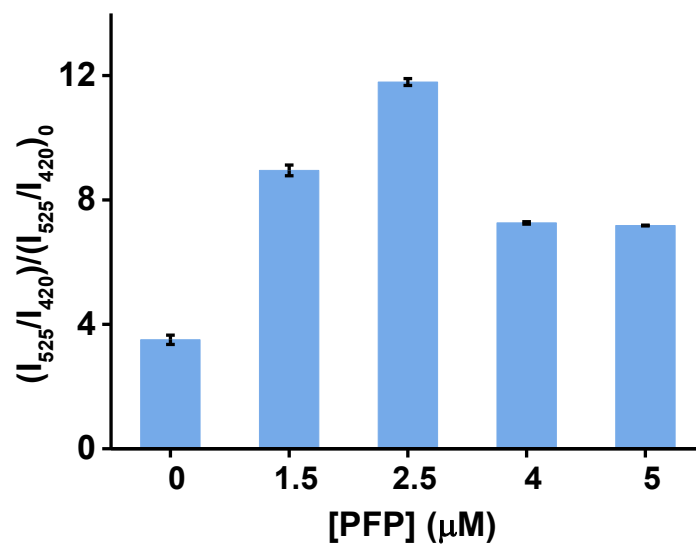

**Fig. S1** Variance of the  $(I_{525}/I_{420})/(I_{525}/I_{420})_0$  value with different concentrations of PFP.

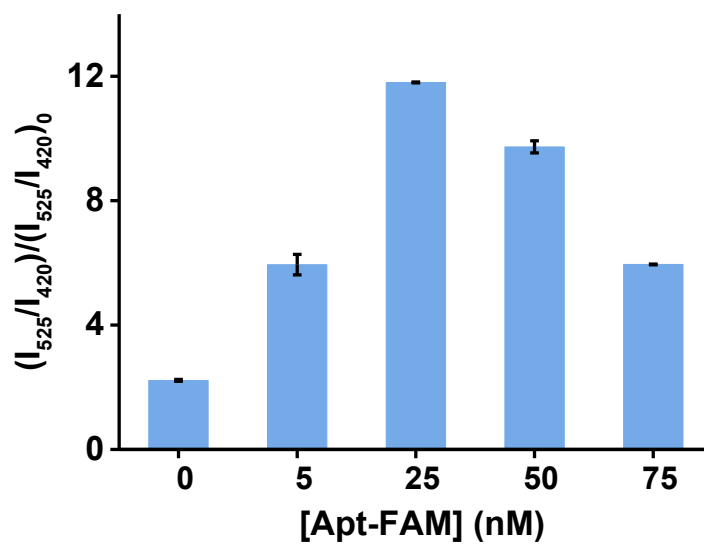

**Fig. S2** Variance of the  $(I_{525}/I_{420})/(I_{525}/I_{420})_0$  value with different concentrations of PFP.

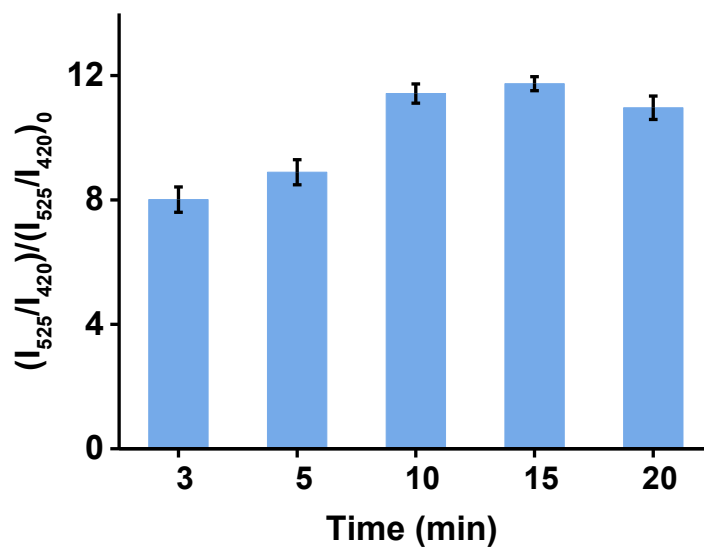

**Fig. S3** Variance of the  $(I_{525}/I_{420})/(I_{525}/I_{420})_0$  value with different incubation time.

**Emission spectra of the PFP system with the increasing concentrations of PFOA**

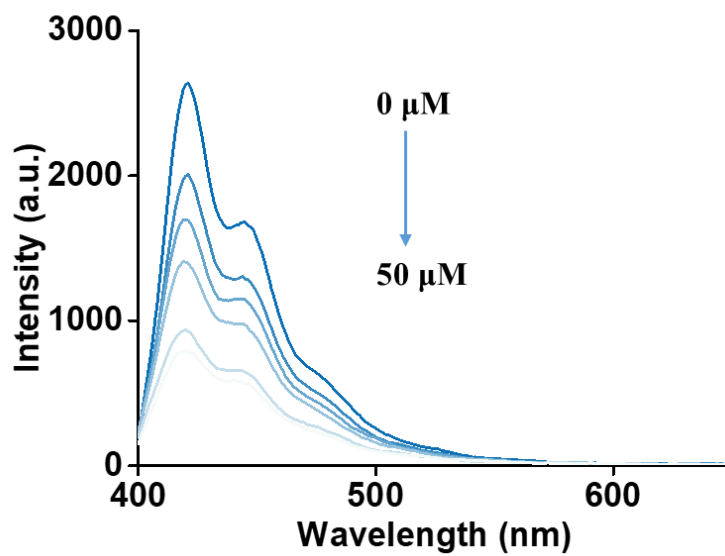

**Fig. S4** Emission spectra of the PFP system in response to the increasing concentrations of PFOA

(0 – 50  $\mu\text{M}$ ).  $\lambda_{\text{ex}} = 380 \text{ nm}$ .

**Table S1.** Comparison of the sensing for PFAS assay.

| Sensing probes                     | Detection mode | Selectivity against SDS/SDBS | LOD (nM)       | Ref.      |
|------------------------------------|----------------|------------------------------|----------------|-----------|
| DNA aptamer/conjugated polymer     | ratiometric    | Yes                          | 27 (PFOA)      | This work |
| Perylene diimide derivatives       | turn off       | Yes                          | 28 (PFOS)      | 2         |
| metal-organic frameworks           | turn off       | N/A                          | 45.9 (PFOA)    | 3         |
| porous zinc-based metallacage      | turn off       | N/A                          | 61.81 (PFOA)   | 4         |
| AuNCs/lysine-calix[4]arene-propoxy | turn off       | N/A                          | 1820 (PFOA)    | 5         |
| metal-organic frameworks           | turn off       | N/A                          | 111 (PFOA)     | 6         |
| indium(III) chloride complex       | turn off       | N/A                          | 500000 (PFHpA) | 7         |
| Guanidinocalix[5]arene             | turn on        | N/A                          | 26.4 (PFOA)    | 8         |
| fluorescent macrocycle             | turn on        | N/A                          | 47.3 (PFOS)    | 9         |
| metal-organic framework            | turn on        | N/A                          | 120 (PFOA)     | 10        |
| cationic deep cavitands            | turn on        | N/A                          | 130 (PFOS)     | 11        |
| multi-head cationic siloxane       | turn on        | N/A                          | 2700 (PFOS)    | 12        |
| conjugated polymer                 | ratiometric    | N/A                          | 2.86 (PFOA)    | 13        |
| conjugated polymer                 | ratiometric    | No                           | 6.12 (PFOA)    | 14        |
| carbon dots                        | ratiometric    | No                           | 27.8 (PFOS)    | 15        |
| DNA aptamer                        | turn off       | N/A                          | 170 (PFOA)     | 16        |

**Table S1:**(continued)

| Sensing probes                    | Detection mode                              | Selectivity against SDS/SDBS | LOD (nM)                     | Ref. |
|-----------------------------------|---------------------------------------------|------------------------------|------------------------------|------|
| DNA aptamer/polyfluorene          | electrochemiluminescence                    | N/A                          | $1.97 \times 10^{-6}$ (PFOA) | 17   |
| DNA aptamer/Cas12a                | turn on                                     | N/A                          | $8.21 \times 10^{-5}$ (PFOA) | 18   |
| DNA aptamer/oxidase-Like Nanozyme | colorimetric and fluorescence dual-modality | N/A                          | 14.3 (PFOA)                  | 19   |

## References

1. B. Liu, S. Wang, G. C. Bazan and A. Mikhailovsky, *J. Am. Chem. Soc.*, 2003, **125**, 13306-13307.
2. Q. Zhang, M. Liao, K. Xiao, K. Zhuang, W. Zheng and Z. Yao, *Sens. Actuators, B*, 2022, **350**, 130851.
3. H. Q. Yin, K. Tan, S. Jensen, S. J. Teat, S. Ullah, X. Hei, E. Velasco, K. Oyekan, N. Meyer, X.-Y. Wang, T. Thonhauser, X.-B. Yin and J. Li, *Chem. Sci.*, 2021, **12**, 14189-14197.
4. Y. He, D. Luo, V. M. Lynch, M. Ahmed, J. L. Sessler and X. Chi, *Chem*, 2023, **9**, 93-101.
5. T. Y. Guo, C. L. Duncan, H. W. Li, C. X. Zhang, M. Mocerino and Y. Wu, *Spectrochim. Acta, Part A*, 2023, **302**, 123127.
6. B. Chen, Z. Yang, X. Qu, S. Zheng, D. Yin and H. Fu, *ACS Appl. Mater. Interfaces*, 2021, **13**, 47706-47716.
7. O. Baumeier, A. Wu, A. Pandya, P. Nelson, P. C. Hillesheim, M. Zeller, G. M. Carignan, J. Li and D. W. Ki, *Chem. Commun.*, 2025, **61**, 10170-10173.



8. Z. Zheng, H. Yu, W. C. Geng, X. Y. Hu, Y. Y. Wang, Z. Li, Y. Wang and D. S. Guo, *Nat. Commun.*, 2019, **10**, 5762-5770.
9. S. N. Lei and H. Cong, *Chin. Chem. Lett.*, 2022, **33**, 1493-1496.
10. Z. Han, Y. Guo, K. Y. Wang, W. Li, J. Huo, Q. Huang, V. I. Bakhmutov, Y. Yang, R. R. Liang and P. R. Taylor, *Angew. Chem. Int. Ed.*, 2025, e15775.
11. R. Lian, Y. D. Yang, J. L. Moreno, Jr., B. L. Eggimann, J. Chen, L. J. Gibson-Elias, C. G. Williams, P. Jiang, A. J. Lee, L. J. Mueller, J. L. Sessler, J. I. Siepmann, D. W. Johnson and R. J. Hooley, *J. Am. Chem. Soc.*, 2025, **147**, 22768-22777.
12. Z. Gou, A. Wang, X. Zhang, Y. Zuo and W. Lin, *Sens. Actuators, B*, 2022, **367**, 132017-132026.
13. C. Zhao, S. Hussain, J. Li, C. Liu, M. A. Afroz, C. Zhu, Z. Yue, J. Zhang, Y. Hao and R. Gao, *Anal. Chem.*, 2025, **97**, 10027-10037.
14. X. Chen, S. Hussain, Y. Tang, X. Chen, S. Zhang, Y. Wang, P. Zhang, R. Gao, S. Wang and Y. Hao, *Sci. Total Environ.*, 2023, **860**, 160467-160477.
15. Q. Chen, P. Zhu, J. Xiong, L. Gao and K. Tan, *Spectrochim. Acta, Part A*, 2020, **224**, 117362.
16. J. Park, K. A. Yang, Y. Choi and J. K. Choe, *Environ. Int.*, 2022, **158**, 107000-107009.
17. Z. Jing, R. Li, J. Zhao, R. Yuan and S. Chen, *Anal. Chem.*, 2024, **96**, 18178-18186.
18. W. Yao, X. Xu, X. Zhai, T. Ji, R. Zhang, S. Xu and X. Luo, *Angew. Chem. Int. Ed.*, 2025, **n/a**, e16838.
19. C. Nie, J. Shui, L. Huang, J. Wang, Y. Shen and Y. Wu, *Anal. Chem.*, 2024, **96**, 13512-13521.
